# Supplementary material
Source: PubMed Central journal article supplement (PMC3009923)

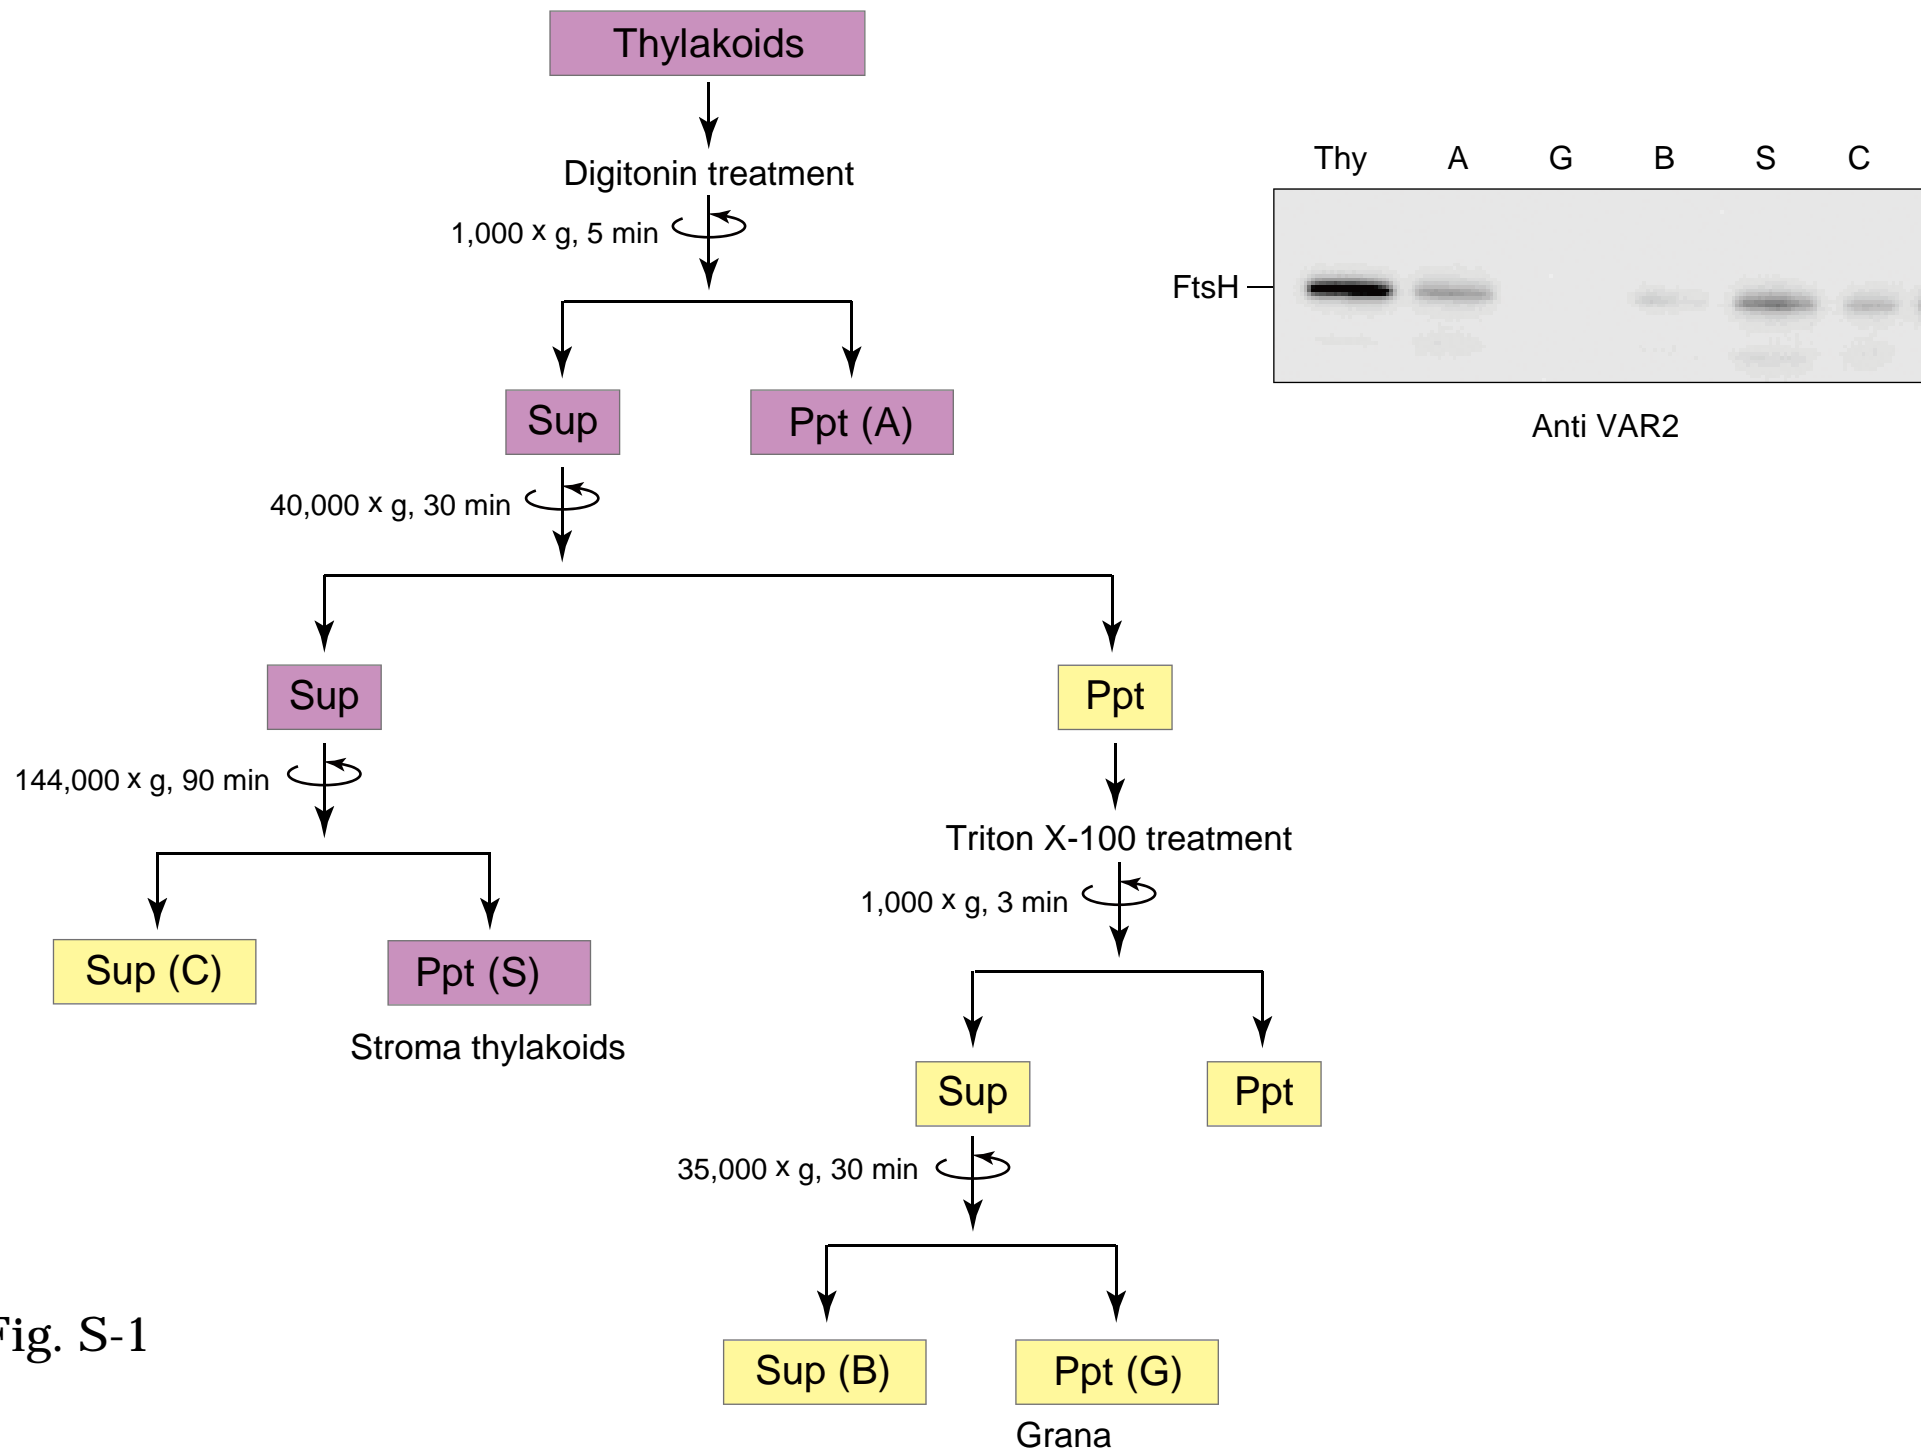

Fig. S-1

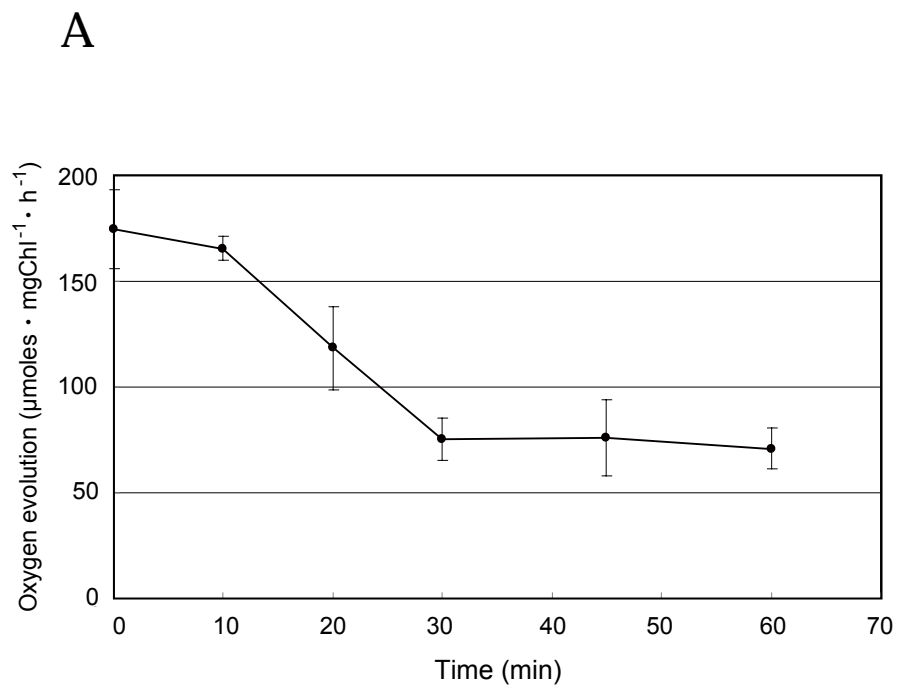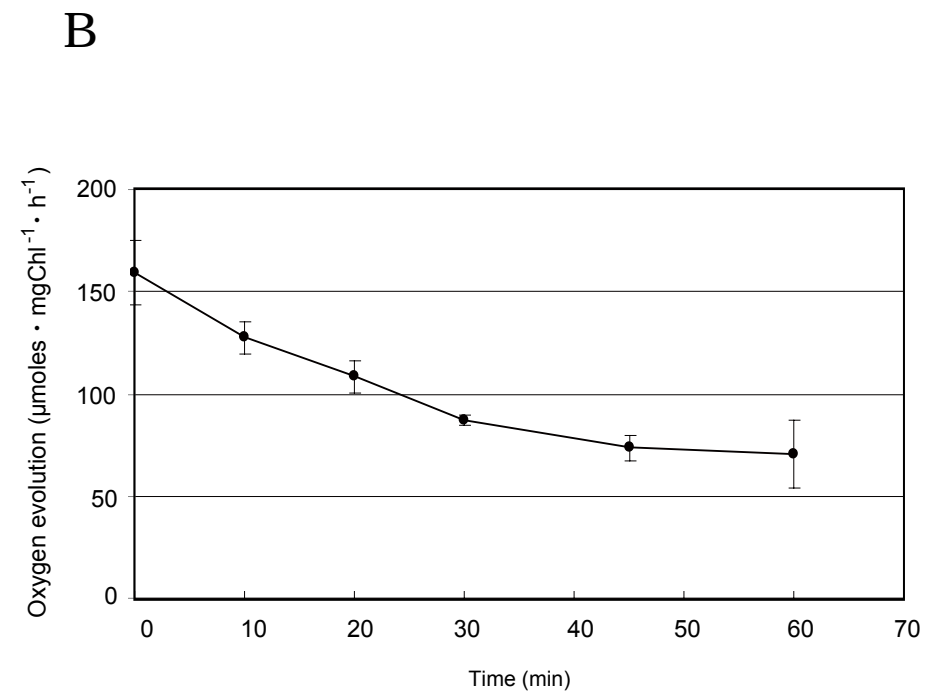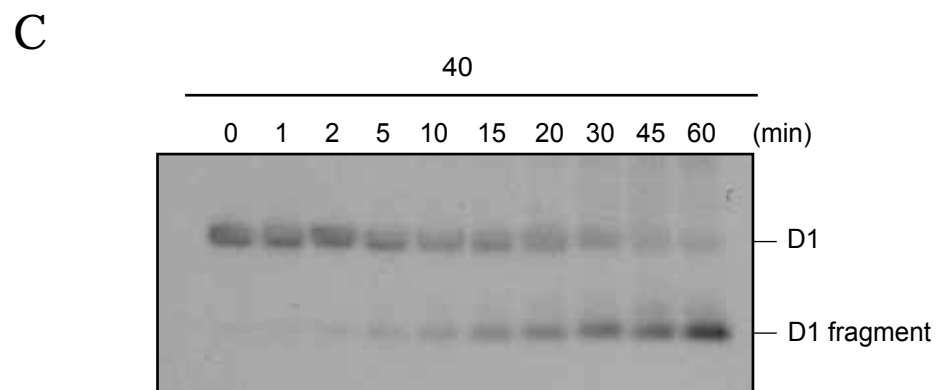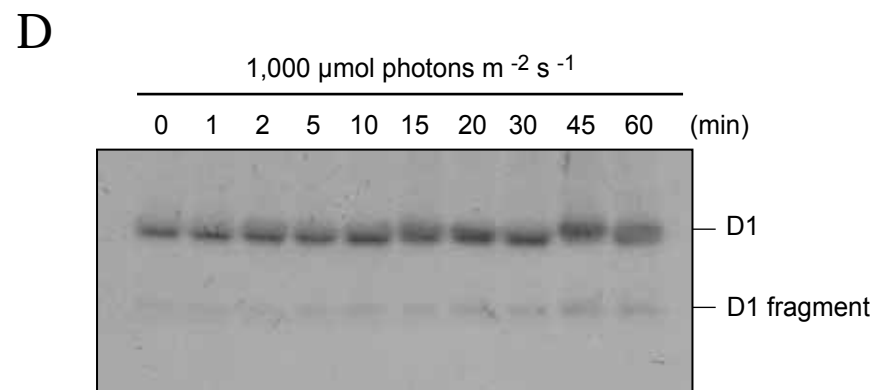

Fig. S-2

A

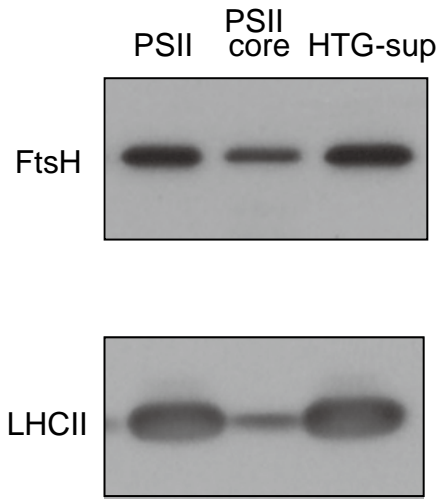

B

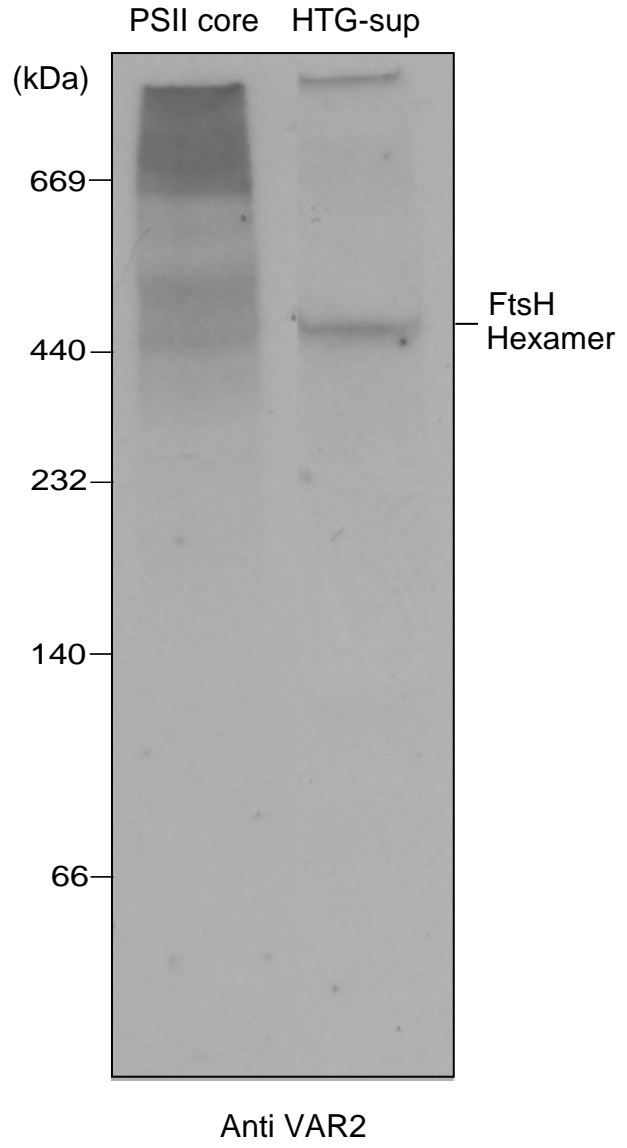

Fig. S-3

Supplement: supp_M110.117432_jbc.M110.117432-1.pdf [file supp_M110.117432_jbc.M110.117432-1.pdf]
